# Supplementary material for: Brain Hypoxia Is Associated With Neuroglial Injury in Humans Post–Cardiac Arrest
Source: PubMed Central journal article supplement (PMC8376277; doi:10.1161/circresaha.121.319157), 2021-07-21
Supplement: res-129-583-s001.pdf [file res-129-583-s001.pdf]

# 1 **SUPPLEMENTAL MATERIAL**

2

## 3 **DETAILED METHODS**

### 4 **Study Participant Eligibility Criteria**

5 Eligible patients met the following inclusion criteria: a) age  $\geq 19$ ; b) sustained cardiac  
6 arrest  $> 10$  minutes requiring cardiopulmonary resuscitation; c) post-return of spontaneous  
7 circulation (ROSC) Glasgow Coma Score  $\leq 8$  and motor score  $\leq 5$  in the absence of clinical  
8 confounders (sedative medications, core body temperature  $< 35^{\circ}\text{C}$ , electrolyte disturbances,  
9 hypoglycemia); d) study enrollment with 72 hours of the initial cardiac arrest. Patients were  
10 excluded if they met any of the following: a) anticipated withdrawal of life-sustaining therapies  
11 within the next 24 hours; b) previous or current traumatic brain injury, intracranial hemorrhage or  
12 stroke; c) concurrent coagulopathy (international normalized ratio  $> 1.5$ , prothrombin time  $> 40$   
13 seconds, platelet count  $< 100 \times 10^9$  cells); d) concurrent anti-platelet or anticoagulant medications;  
14 e) anticipated cardiac catheterization within the next 7 days.

15

### 16 **Patient Management**

17 Patients were managed according to our institutional post-cardiac arrest management  
18 protocol, which is in keeping with international guideline recommendations. Specifically, patients  
19 were managed with targeted temperature management ( $35$  to  $36^{\circ}\text{C}$ ) for 24 to 48 hours using  
20 intravascular cooling (Solex®, Zoll, USA). The primary sedative was intravenous propofol (0 to  
21  $80\mu\text{g}/\text{kg}/\text{min}$ ) and second line agents included intravenous midazolam (0 to  $30\text{mg}/\text{h}$ ) or narcotics  
22 (fentanyl 0 to  $200\text{mcg}/\text{h}$ ). Propofol was kept constant across the neuromonitoring period. Clinical  
23 directive was to maintain normoxemia ( $\text{PaO}_2$  80 to  $100\text{mmHg}$ ) and normocapnia ( $\text{PaCO}_2$  35 to

1 45mmHg) for the duration of the study. Mean arterial pressure > 65mmHg was targeted at the  
2 discretion of the attending physician with intravenous norepinephrine as the first line vasopressor.  
3 Finally, hemoglobin concentration was maintained > 90g/L. The neuromonitoring data was  
4 available for the attending physician to view and use in the post-resuscitation management of the  
5 patients in keeping with our institution's neuromonitoring guidelines.

6

### 7 **Hypertonic Saline**

8 In the normoxic patients, hypertonic saline was infused 32±33 hours following the insertion  
9 of neuromonitoring. In the hypoxic patients, hypertonic saline was infused 12±11 hours following  
10 the insertion of neuromonitoring. Serum sodium concentration increased from 142.6±3.3 prior to  
11 infusion to 146.4±4.4 mmol/L 6 hours following the infusion (P<0.001).

12

### 13 **Healthy controls Normoxia and Hypoxia Catheterization**

14

15 Upon arrival to the laboratory, participants voided their bladder and assumed the supine  
16 position for instrumentation with an internal jugular venous and radial arterial catheter. Using  
17 sterile technique, a 20G arterial catheter (Arrow®, Markham, ON, Canada) was advanced into the  
18 left radial artery under local anesthesia (Lidocaine, 1.0%). This technique was assisted via the use  
19 of ultrasound guidance. Subsequently, a 13G central venous catheter (Cook Medical®,  
20 Bloomington, IN, USA) was advanced into the right internal jugular vein, again under sterile  
21 conditions and with the use of local anesthesia and ultrasound guidance. The catheter was then  
22 advanced up to 15 cm cephalad.<sup>53</sup> This technique has been previously demonstrated by our group  
23 to lead to catheter tip placement in the jugular bulb, which is importantly proximal to the facial

1 vein.<sup>54</sup> Further, correct placement was additionally determined by participants noting a sensation  
2 in their ear upon full insertion of the catheter.<sup>53</sup> Fulfilment of these techniques leads to  $\leq 3\%$   
3 contamination by extra-cerebral blood.<sup>53</sup>

4

## 5 **Biomarker Analysis**

6 Serum samples from both healthy controls and HIBI patients were analyzed for markers of  
7 neuronal and astroglial injury with the Quanterix® platform using the Simoa HD-1® analyzer  
8 (Billerica, MA, USA) by an investigator blinded to the patients' physiological and outcome data.  
9 The following assays were preformed using the manufacturers protocols and diluted on board at a  
10 4-fold dilution and run in duplicate; glial fibrillary acidic protein (GFAP) discovery kit (102336),  
11 which reflects astroglial damage and BBB permeability;<sup>27</sup> ubiquitin carboxyl-terminal hydrolase  
12 L1 (UCH-L1) discovery kit (102343), which reflects neuronal cell body injury;<sup>27</sup> total tau  
13 advantage kit (101552) and neurofilament-light (NF-L) advantage kit (103186), which reveal  
14 axonal damage. Neuron specific enolase (NSE) discovery kit (102475), an intra-cytosolic enzyme,  
15 which represents neuron cell body injury<sup>27</sup>, was run using the manufacturers protocols with  
16 samples diluted off board at a 50-fold dilution and run in duplicate. For each assay, subjects were  
17 randomized into three runs, each of which included an 8-point standard curve, two manufacturer  
18 provided controls and three internally provided serum controls. For markers that had serum  
19 samples above the upper limit of detection, these samples were re-analyzed using a higher off-  
20 board dilution than the standard outlined in the manufactures protocol. These adaptations were as  
21 follows: GFAP was diluted up to either a 200 or 1000-fold dilution, NF-L was run at a 20-fold  
22 dilution, and NSE was diluted up to either a 400 or 1000-fold dilution.

1 Inflammatory cytokines (IL-6, IL-10, & TNF- $\alpha$ ) were quantified using the Simoa HD-1  
2 platform from Quanterix (Billerica, MA, USA) following the manufacturer's protocol using a  
3 cytokine 3-plex A advantage assay (101160). This assay was run using an on board 4-fold dilution  
4 and all samples were run in duplicate. Subjects were randomized into three runs, each of which  
5 included an 8-point standard curve, two manufacturer provided controls and three internally  
6 provided serum controls. Serum samples above the upper limit of detection were reanalyzed using  
7 an off-board 20-fold dilution.

8 Markers of endothelial injury were measured as follows. E-selectin, P-selectin, sICAM-3,  
9 and thrombomodulin were analyzed using the MSD Human Vascular Injury 1 Kit (K15135C,  
10 Meso Scale Diagnostics®, MD, USA). Syndecan-1 (LSEHSDC1) and von Willebrand Factor  
11 (LSEHVWF) were quantified using Invitrogen™ Human Elisa Kits (Invitrogen, CA, USA). The  
12 following protocol adaptations were made: Syndecan-1; all samples were diluted 20-fold, vWF;  
13 all samples were diluted 4000-fold. All samples were run on the same day split over 3 individual  
14 plates, each with an 8pt standard curve, two serum samples from healthy controls to serve as inter-  
15 plate controls, and a balance of control and HIBI patients all run in duplicate. Samples from an  
16 individual patient were all run on the same plate, using a randomized order for a total of 40  
17 specimens per plate.

1 **SUPPLEMENTAL TABLES**

2

3 **Online Table I. Patient characteristics and clinical data.**

|                                     |                                          | <b>Normoxic<br/>(n=8)</b> | <b>Hypoxic<br/>(n=10)</b> |
|-------------------------------------|------------------------------------------|---------------------------|---------------------------|
| <b>Age (years)</b>                  | Median [IQR]                             | 33 [22-54]                | 47 [42-52]                |
| <b>Height (cm)</b>                  | Median [IQR]                             | 172 [164-                 | 184 [165-188]             |
| <b>Weight (kg)</b>                  | Median [IQR]                             | 68 [56-80]                | 85 [68-91]                |
| <b>OHCA</b>                         | n (%)                                    | 6 (75)                    | 9 (90)                    |
| <b>Witnessed</b>                    | n (%)                                    | 5 (62.5)                  | 6 (60)                    |
| <b>Bystander CPR</b>                | n (%)                                    | 5 (62.5)                  | 8 (80)                    |
| <b>Initial Rhythm</b>               | n (%)                                    |                           |                           |
|                                     | PEA                                      | 7(87.5)                   | 8(80)                     |
|                                     | Asystole                                 | 0(0)                      | 2(20)                     |
|                                     | VF                                       | 1 (12.5)                  | 0(0)                      |
| <b>Arrest etiology</b>              | n (%)                                    |                           |                           |
|                                     | Hypoxia                                  | 2(25)                     | 4(40)                     |
|                                     | Trauma                                   | 2(25)                     | 0(0)                      |
|                                     | Anaphylaxis                              | 1(12.5)                   | 0(0)                      |
|                                     | VF                                       | 1(12.5)                   | 0(0)                      |
|                                     | Cocaine                                  | 1(12.5)                   | 0(0)                      |
|                                     | Hemorrhage                               | 1(12.5)                   | 0(0)                      |
|                                     | Opioids                                  | 0(0)                      | 2(20)                     |
|                                     | Drowning                                 | 0(0)                      | 2(20)                     |
|                                     | Asthma                                   | 0(0)                      | 1(10)                     |
|                                     | Electrocution                            | 0(0)                      | 1(10)                     |
| <b>Time to ROSC (min)</b>           | Median [IQR]                             | 16 [13-24]                | 18 [17-26]                |
| <b>Post ROSC GCS</b>                | Median [IQR]                             | 4 [4-6]                   | 3 [3-3]                   |
| <b>Pupillary reflex</b>             | n (%)                                    | 7 (87.5)                  | 9 (90)                    |
| <b>Corneal reflex</b>               | n (%)                                    | 7 (87.5)                  | 7 (70)                    |
| <b>Motor Score</b>                  | Median [IQR]                             | 1 [1-2]                   | 1 [1-1.3]                 |
| <b>EEG waveform</b>                 | n (%)                                    |                           |                           |
|                                     | Alpha rhythm                             | 3 (37.5)                  | 0 (0)                     |
|                                     | Status epilepticus                       | 2 (25)                    | 1 (10)                    |
|                                     | Severe encephalopathy                    | 1 (12.5)                  | 4 (40)                    |
|                                     | GPEDs                                    | 1 (12.5)                  | 1 (10)                    |
|                                     | Myoclonus                                | 0 (0)                     | 1 (10)                    |
|                                     | Modified burst suppression<br>with Theta | 1 (12.5)                  | 2 (20)                    |
|                                     | Theta                                    | 0 (0)                     | 1 (10)                    |
| <b>SSEPs</b>                        | n (%)                                    | 0 (0)                     | 0 (0)                     |
| <b>GW differentiation loss (CT)</b> | n (%)                                    | 1 (12.5)                  | 7 (70)                    |
| <b>Restricted Diffusion (MRI)</b>   | n (%)                                    | 2 (33)                    | 4 (80)                    |
| <b>6 month CPC</b>                  | n (%)                                    |                           |                           |

|   |        |        |
|---|--------|--------|
| 1 | 4 (50) | 1 (10) |
| 2 | 2 (25) | 1 (10) |
| 3 | 0 (0)  | 0 (0)  |
| 4 | 0 (0)  | 1 (1)  |
| 5 | 2 (25) | 7 (70) |

|                                                |                     |                   |                   |
|------------------------------------------------|---------------------|-------------------|-------------------|
| <b>Delay from arrest to blood sample (hrs)</b> | <b>Median [IQR]</b> | <b>19 [12-34]</b> | <b>28 [13-51]</b> |
|------------------------------------------------|---------------------|-------------------|-------------------|

1 CT, computed tomography; EEG, electroencephalography; GPED, Generalized periodic  
2 epileptiform discharge; MRI, magnetic resonance imaging; OHCA, out of hospital cardiac arrest;  
3 ROSC, return of spontaneous circulation; GCS, Glasgow coma scale; CPC, cerebral performance  
4 category; PEA, pulseless electrical activity; VF, ventricular fibrillation; IQR, interquartile range.  
5 **There was no difference in the delay between cardiac arrest and the first blood sample for**  
6 **biomarker analyses (P=0.65).** Note, one patient in the hypoxic group was lost to follow up. Not  
7 every patient received an MRI, therefore the % of patients noted with restricted diffusion is  
8 based upon the number of patients examined (6 for the normoxic patients and 5 for the hypoxic  
9 patients).

1 **Online Table II. Arterial-to-Jugular venous gradients from biomarkers of neuronal,**  
 2 **astroglial, and endothelial injury as well as neuro-inflammation.**

|                                |         | <b>Healthy<br/>Volunteers<br/>(N=14)</b> | <b>Normoxic HIBI<br/>patients<br/>(N=8)</b> | <b>Hypoxic HIBI<br/>patients<br/>(N=10)</b> |
|--------------------------------|---------|------------------------------------------|---------------------------------------------|---------------------------------------------|
| <b>GFAP</b>                    | (pg/mL) | -2.4 [-8.0 – 3.7]                        | -0.7 [-37.5 – 12.1]                         | -161 [ -3695 – -75]                         |
| <b>NF-L</b>                    | (pg/mL) | -0.2 [-0.4 – 0.5]                        | 0.4 [ -3.1 – 23.0]                          | -231 [-370 – -11]                           |
| <b>Tau</b>                     | (pg/mL) | -0.05 [-0.16 –<br>0.01]                  | 0.04 [-0.65 – 0.32]                         | -32 [-310 – -3]                             |
| <b>NSE</b>                     | (pg/mL) | -301 [-1454 – 271]                       | -182 [ -3114 – 6331]                        | -14890 [-148813 – -<br>3311]                |
| <b>UCH-L1</b>                  | (pg/mL) | 0.0 [-1.8 – 0.0]                         | -1.5 [-4.6 – 3.0]                           | -14.7 [-37.7 – -4.1]                        |
|                                |         |                                          |                                             |                                             |
| <b>E-selectin</b>              | (ng/mL) | 0.15 [-0.28 – 0.70]                      | 0.16 [-0.20 – 1.19]                         | 0.12 [-1.6 – 5.3]                           |
| <b>P-selectin</b>              | (ng/mL) | 0.59 [-2.91 – 6.57]                      | 0.13 [-7.9 – 4.50]                          | 2.10 [ -10.4 – 10.1]                        |
| <b>sICAM-3</b>                 | (ng/mL) | 0.02 [-0.07 – 0.14]                      | -0.01 [-0.20 – 0.52]                        | -0.03 [-0.45 – 0.13]                        |
| <b>Thrombomodulin</b>          | (ng/mL) | 0.05 [ -0.10 – 0.14]                     | -0.01 [-0.49 – 1.04]                        | 0.13 [-0.20 – 0.80]                         |
| <b>vWF</b>                     | (ng/mL) | 1380 [-1131 –<br>7875]                   | 2643 [-3354 – 20918]                        | 1365 [-13717 – 8596]                        |
| <b>Syndecan-1</b>              | (pg/mL) | -149 [-239 – 1178]                       | -460 [-1360 – 245]                          | -268 [-834 – 117]                           |
|                                |         |                                          |                                             |                                             |
| <b>IL-6</b>                    | (pg/mL) | -0.38 [-1.8 – -0.21]                     | 2.6 [-3.6 – 19.7]                           | -10.3 [-43.0 – -4.2]                        |
| <b>IL-10</b>                   | (pg/mL) | -0.02 [-0.05 – 0.0]                      | 0.35 [-1.6 – 2.3]                           | 0.14 [-2.2 – 0.38]                          |
| <b>TNF-<math>\alpha</math></b> | (pg/mL) | -0.43 [-1.8 – -0.21]                     | 0.09 [-0.35 – 0.15]                         | 0.03 [-0.42 – 0.25]                         |

3

4

1 **Online Table III. Relationship between time to return of spontaneous circulation and the**  
2 **arterial-to-venous gradient for markers of neurovascular unit injury.**

|        | Spearman's Rho | 95% CI's      | P-value |
|--------|----------------|---------------|---------|
| GFAP   | -0.13          | -0.60 to 0.40 | 0.61    |
| NF-L   | -0.11          | -0.56 to 0.39 | 0.67    |
| Tau    | -0.38          | -0.73 to 0.12 | 0.12    |
| NSE    | -0.19          | -0.61 to 0.32 | 0.46    |
| UCH-L1 | -0.01          | -0.49 to 0.47 | 0.97    |

3 Data represent the correlation between the time to return of spontaneous correlation and the  
4 cerebral release of each biomarker (i.e. A-v gradient). Significance testing was conducted with  
5 the non-parametric Spearman's correlation.

6



1  
2  
3  
4

**Online Table IV. Receiver operator curve characteristics for clinical labs and brain biomarkers to differentiate between brain hypoxia and normoxia in post cardiac arrest HIBI patients.**

| Clinical Laboratory Data (Arterial Blood Samples) |           |               |           |               |           |               |
|---------------------------------------------------|-----------|---------------|-----------|---------------|-----------|---------------|
|                                                   | Admission |               | Peak      |               | Median    |               |
|                                                   | AUC       | P-value       | AUC       | P-value       | AUC       | P-value       |
| Lactate                                           | 0.71±0.13 | 0.15          | 0.71±0.13 | 0.13          | 0.58±0.14 | 0.56          |
| pH                                                | 0.68±0.13 | 0.20          | 0.64±0.14 | 0.31          | 0.73±0.13 | 0.11          |
| HCO <sub>3</sub> <sup>-</sup>                     | 0.57±0.15 | 0.63          | 0.56±0.14 | 0.66          | 0.53±0.14 | 0.82          |
| Troponin                                          | 0.76±0.12 | 0.062         | 0.58±0.15 | 0.59          | 0.51±0.15 | 0.96          |
| LDH                                               | 0.63±0.14 | 0.37          | 0.50±0.15 | 1.0           | 0.64±0.14 | 0.33          |
| Creatinine                                        | 0.61±0.14 | 0.45          | 0.57±0.14 | 0.63          | 0.58±0.14 | 0.59          |
| AST                                               | 0.53±0.15 | 0.86          | 0.54±0.14 | 0.79          | 0.51±0.14 | 0.93          |
| ALT                                               | 0.51±0.15 | 0.93          | 0.60±0.14 | 0.48          | 0.50±0.14 | 1.0           |
| Brain Biomarkers (Arterial Blood Samples)         |           |               |           |               |           |               |
|                                                   | Admission |               | Peak      |               | Median    |               |
|                                                   | AUC       | P-value       | AUC       | P-value       | AUC       | P-value       |
| GFAP                                              | 0.85±0.10 | <b>0.013</b>  | 0.89±0.08 | <b>0.0059</b> | 0.93±0.06 | <b>0.0025</b> |
| NF-L                                              | 0.88±0.09 | <b>0.0077</b> | 0.93±0.06 | <b>0.0025</b> | 0.93±0.06 | <b>0.0025</b> |
| Tau                                               | 0.90±0.07 | <b>0.0045</b> | 0.95±0.05 | <b>0.0014</b> | 0.95±0.05 | <b>0.0014</b> |
| UCH-L1                                            | 0.81±0.11 | <b>0.026</b>  | 0.85±0.10 | <b>0.013</b>  | 0.86±0.10 | <b>0.010</b>  |
| NSE                                               | 0.80±0.11 | <b>0.033</b>  | 0.79±0.11 | <b>0.041</b>  | 0.76±0.12 | 0.062         |
| Brain Biomarkers (A-v gradients)                  |           |               |           |               |           |               |
|                                                   | Admission |               | Minimum   |               | Median    |               |
|                                                   | AUC       | P-value       | AUC       | P-value       | AUC       | P-value       |
| GFAP                                              | 0.90±0.08 | <b>0.0053</b> | 0.89±0.09 | <b>0.0071</b> | 0.86±0.10 | <b>0.012</b>  |
| NF-L                                              | 0.76±0.12 | 0.062         | 0.79±0.12 | <b>0.041</b>  | 0.86±0.10 | <b>0.010</b>  |
| Tau                                               | 0.90±0.09 | <b>0.0045</b> | 0.95±0.05 | <b>0.0014</b> | 0.83±0.11 | <b>0.021</b>  |
| UCH-L1                                            | 0.84±0.10 | <b>0.016</b>  | 0.78±0.12 | 0.054         | 0.79±0.12 | <b>0.043</b>  |
| NSE                                               | 0.86±0.09 | <b>0.010</b>  | 0.89±0.08 | <b>0.0059</b> | 0.85±0.09 | <b>0.013</b>  |

5 Receiver operator characteristic analysis for admission, peak, and median data over the first 3  
6 days of monitoring. N= 18 for all ROC curve data, except for fibrinogen where N=12 (4  
7 normoxic and 8 hypoxic patients). ROC data are the area under the curve (AUC) ± standard  
8 error.

1 **SUPPLEMENTAL FIGURES**

2  
3

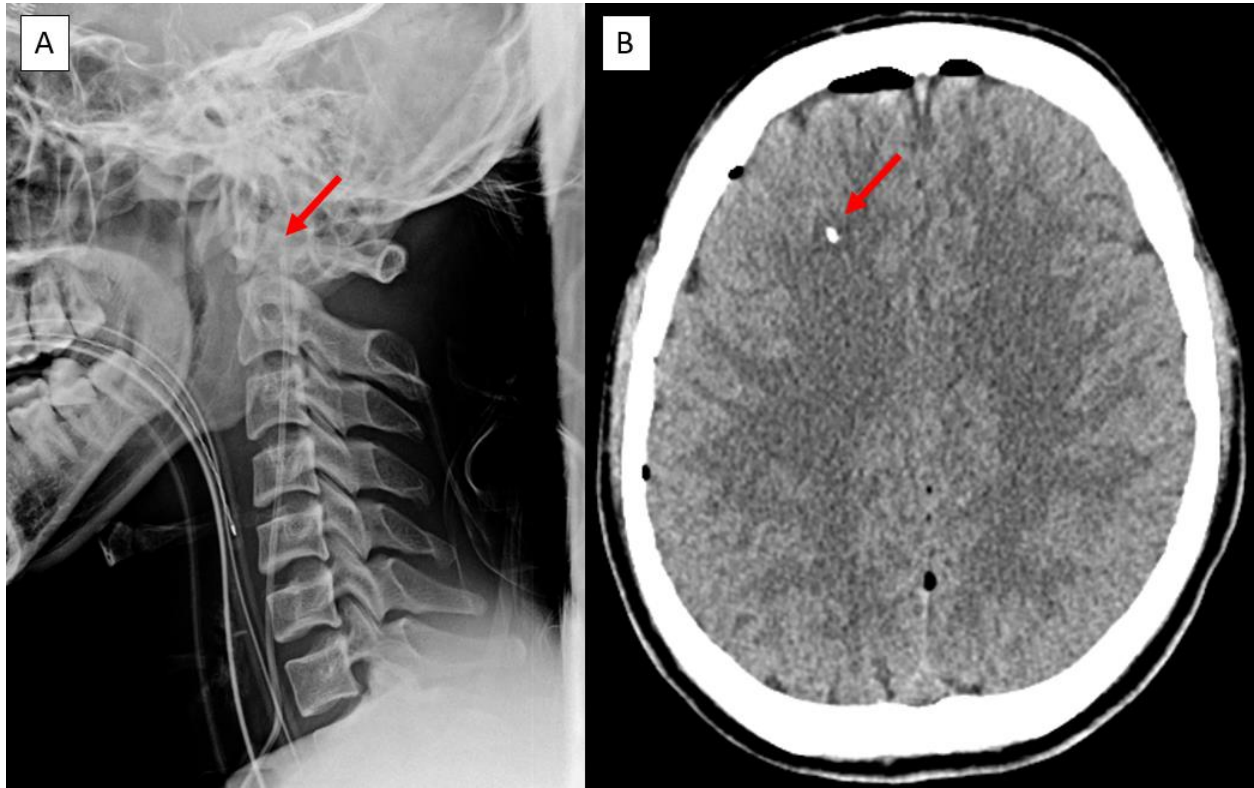

4  
5 **Online Figure I. Confirmation of the jugular bulb catheter and cranial access bolt.** The position of the  
6 jugular bulb catheter tip (Panel A) and the cranial access bolt (Panel B) are denoted by red arrows.

7  
8  
9

1  
2  
3

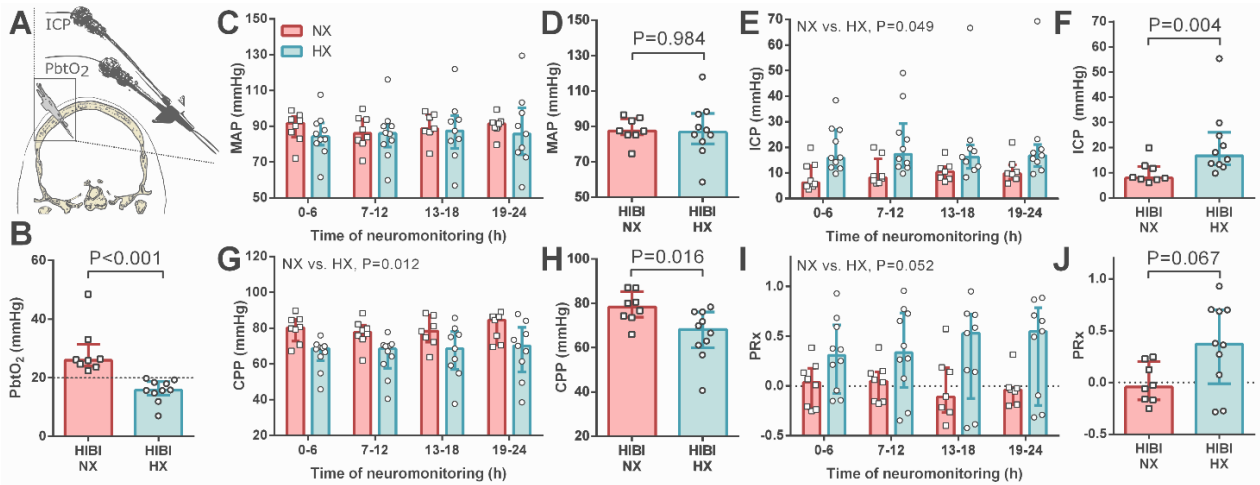

4  
5

**Online Figure II. Cerebrovascular physiology and brain tissue partial pressure of oxygen in hypoxic**

**ischemic brain injury patients following cardiac arrest.** Hypoxic ischemic brain injury (HIBI) patients

exhibiting brain normoxia (NX), are presented as a red bars (median±IQR), while those exhibiting brain

hypoxia (HX) are denoted by the cyan coloured bars. Individual patient data are overlaid for both groups.

Mean arterial pressure (MAP: Panel A&B), intracranial pressure (ICP: Panel C&D), cerebral perfusion

pressure (CPP; Panel E&F), and the pressure reactivity index (PRx; an index of cerebral autoregulation<sup>15,55</sup>

Panel G&H) are depicted in 6 hour increments of neuromonitoring as well as their overall average values

for the first 24hours of neuromonitoring combined. Importantly, to differentiate between brain hypoxia and

normoxia and stratify our patients, a brain partial pressure of oxygen (PbtO<sub>2</sub>; panel I) cut off of 20 mmHg

was used. The 6 hour binned neuromonitoring data were assessed using linear mixed effects models using

a compound symmetry co-variance structure with both time (0-6 vs. 7-12 vs. 13-18 vs. 19-24 hours) and

brain oxygenation (normoxia vs. hypoxia) as fixed factors and patients as a random factor. Twenty-four

hour mean data were compared using a Mann-Whitney U Test.

17

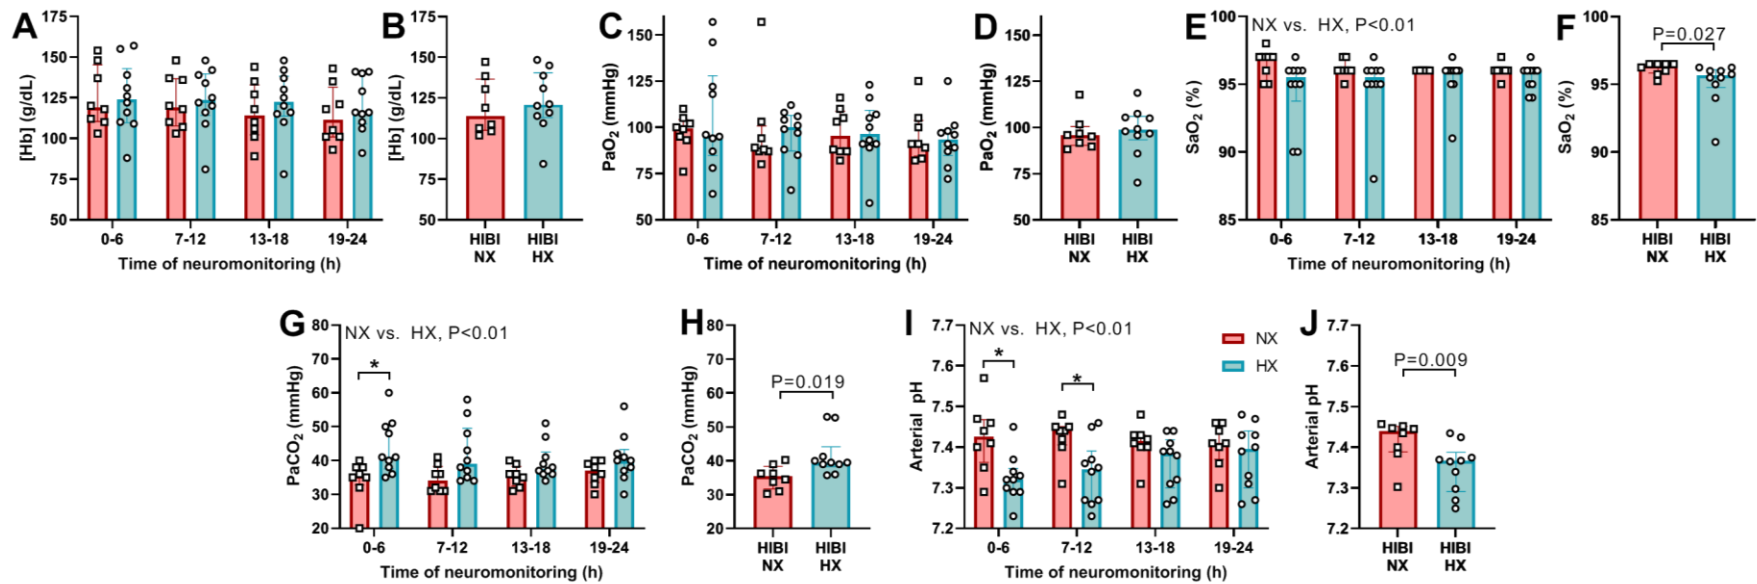

1  
 2 **Online Figure III. Arterial blood gases in the hypoxic ischemic brain injury patients following cardiac arrest.** Hypoxic ischemic brain injury  
 3 (HIBI) patients exhibiting brain normoxia (NX), are presented as a red bars (median±IQR), while those exhibiting brain hypoxia (HX) are denoted  
 4 by the cyan coloured bars. Individual patient data are overlaid for both groups. Hemoglobin concentration ([Hb]: Panel A&B), the partial pressure  
 5 of arterial oxygen (PaO<sub>2</sub>: Panel C&D), arterial oxygen saturation (SaO<sub>2</sub>; Panel E&F), the partial pressure of arterial carbon dioxide (PaCO<sub>2</sub>; Panel  
 6 G&H), and arterial pH (Panel I&J) are depicted in 6 hour increments of neuromonitoring as well as their overall average values for the first 24hours  
 7 of neuromonitoring combined. The 6 hour binned neuromonitoring data were assessed using linear mixed effects models using a compound  
 8 symmetry co-variance structure with both time (0-6 vs. 7-12 vs. 13-18 vs. 19-24 hours) and brain oxygenation (normoxia vs. hypoxia) as fixed  
 9 factors and patients as a random factor. Twenty-four hour mean data were compared using a Mann-Whitney U Test.

1

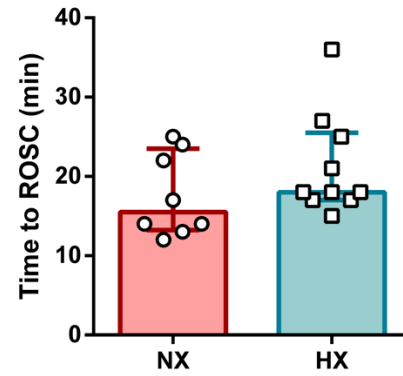

2

3 **Online Figure IV. Time to return of spontaneous circulation in post cardiac arrest patient with brain normoxia and hypoxia.** Hypoxic  
4 ischemic brain injury (HIBI) patients exhibiting brain normoxia (NX), are presented as a red bars (median±IQR), while those exhibiting brain  
5 hypoxia (HX) are denoted by the cyan coloured bars. Individual patient data are overlaid for both groups. Significance testing was conducted with  
6 a Mann Whitney U test. Time to ROSC was not different between groups (P=0.19).

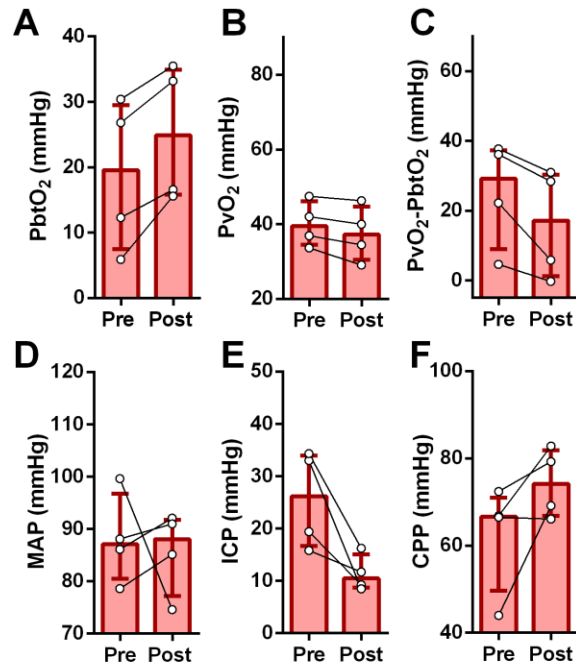

1  
2 **Online Figure V. Hypertonic saline infusion in cardiac arrest patients with brain normoxia.** Hypoxic ischemic brain injury (HIBI) patients  
3 exhibiting brain normoxia (NX, n=4), are presented as a red bars (median±IQR). Individual patient data are overlaid. The one hour mean immediately  
4 pre to hypertonic saline infusion (pre) and the six hour mean immediately following infusion (post) are depicted for brain tissue partial pressure of  
5 oxygen (PbtO<sub>2</sub>; Panel A), partial pressure of jugular bulb venous oxygen (PvO<sub>2</sub>; Panel B), the PvO<sub>2</sub>-PbtO<sub>2</sub> gradient (Panel C), mean arterial pressure  
6 (MAP; Panel D), intracranial pressure (ICP; Panel E), and cerebral perfusion pressure (CPP; Panel F). Only 4 **normoxic** HIBI patients received  
7 hypertonic saline based on clinical indication, thus while the data are presented for transparency no statistical analyses were completed.
