# Supplementary material for: Brain Hypoxia Is Associated With Neuroglial Injury in Humans Post–Cardiac Arrest
Source: PubMed Central journal article supplement (PMC8376277; doi:10.1161/circresaha.121.319157), 2021-07-21
Supplement: res-129-583-s002.pdf [file res-129-583-s002.pdf]

## Major Resources Table

In order to allow validation and replication of experiments, all essential research materials listed in the Methods should be included in the Major Resources Table below. Authors are encouraged to use public repositories for protocols, data, code, and other materials and provide persistent identifiers and/or links to repositories when available. Authors may add or delete rows as needed.

### Animals (in vivo studies)

| Species | Vendor or Source | Background Strain | Sex | Persistent ID / URL |
|---------|------------------|-------------------|-----|---------------------|
| N/A     |                  |                   |     |                     |
|         |                  |                   |     |                     |
|         |                  |                   |     |                     |

### Genetically Modified Animals

|                 | Species | Vendor or Source | Background Strain | Other Information | Persistent ID / URL |
|-----------------|---------|------------------|-------------------|-------------------|---------------------|
| Parent - Male   | N/A     |                  |                   |                   |                     |
| Parent - Female |         |                  |                   |                   |                     |

### Antibodies

| Target antigen | Vendor or Source | Catalog # | Working concentration | Lot # (preferred but not required) | Persistent ID / URL |
|----------------|------------------|-----------|-----------------------|------------------------------------|---------------------|
| N/A            |                  |           |                       |                                    |                     |
|                |                  |           |                       |                                    |                     |

### DNA/cDNA Clones

| Clone Name | Sequence | Source / Repository | Persistent ID / URL |
|------------|----------|---------------------|---------------------|
| N/A        |          |                     |                     |
|            |          |                     |                     |
|            |          |                     |                     |

### Cultured Cells

| Name | Vendor or Source | Sex (F, M, or unknown) | Persistent ID / URL |
|------|------------------|------------------------|---------------------|
| N/A  |                  |                        |                     |
|      |                  |                        |                     |
|      |                  |                        |                     |

### Data & Code Availability

| Description | Source / Repository | Persistent ID / URL |
|-------------|---------------------|---------------------|
| N/A         |                     |                     |
|             |                     |                     |
|             |                     |                     |

### Other

| Biomarker Analysis Kits         | Vendor or Source | Catalog # | URL                                                                                                                                                           |
|---------------------------------|------------------|-----------|---------------------------------------------------------------------------------------------------------------------------------------------------------------|
| Glial Fibrillary Acidic Protein | Quanterix        | 102336    | <a href="https://www.pblassaysci.com/sites/default/files/qtx_gfap_dis_102336.pdf">https://www.pblassaysci.com/sites/default/files/qtx_gfap_dis_102336.pdf</a> |
| Neurofilament Light             | Quanterix        | 103186    | <a href="https://www.pblassaysci.com/sites/default/files/qtx_nf-l_adv_103186.pdf">https://www.pblassaysci.com/sites/default/files/qtx_nf-l_adv_103186.pdf</a> |

DOI [to be added]

|                                                                                     |                        |          |                                                                                                                                                                                                                                                                                                                                                                                                       |
|-------------------------------------------------------------------------------------|------------------------|----------|-------------------------------------------------------------------------------------------------------------------------------------------------------------------------------------------------------------------------------------------------------------------------------------------------------------------------------------------------------------------------------------------------------|
| Total Tau                                                                           | Quanterix              | 101552   | <a href="https://www.chimera-biotec.com/fileadmin/public/images/Datasheets/Tau_item_101552_Chimera.pdf">https://www.chimera-biotec.com/fileadmin/public/images/Datasheets/Tau_item_101552_Chimera.pdf</a>                                                                                                                                                                                             |
| Neuron Specific Enolase                                                             | Quanterix              | 102475   | <a href="https://www.chimera-biotec.com/fileadmin/public/images/Datasheets/NSE_item_102475_Chimera.pdf">https://www.chimera-biotec.com/fileadmin/public/images/Datasheets/NSE_item_102475_Chimera.pdf</a>                                                                                                                                                                                             |
| Ubiquitin carboxyl-terminal hydrolase L1                                            | Quanterix              | 102343   | <a href="https://www.chimera-biotec.com/fileadmin/public/images/Datasheets/UCH-L1_item_102343_Chimera.pdf">https://www.chimera-biotec.com/fileadmin/public/images/Datasheets/UCH-L1_item_102343_Chimera.pdf</a>                                                                                                                                                                                       |
| Interleukin-6; Interleukin 10; Tumor Necrosis Factor Alpha                          | Quanterix              | 101160   | <a href="https://www.quanterix.com/wp-content/uploads/2020/12/Simoa_C3PA_Data_Sheet-SR-X.pdf">https://www.quanterix.com/wp-content/uploads/2020/12/Simoa_C3PA_Data_Sheet-SR-X.pdf</a>                                                                                                                                                                                                                 |
| E-selectin; P-selectin; soluble intracellular adhesion molecule – 3; Thrombomodulin | Meso Scale Diagnostics | K15135C  | <a href="https://www.mesoscale.com/en/products/human-vascular-injury-i-kit-k15135c/">https://www.mesoscale.com/en/products/human-vascular-injury-i-kit-k15135c/</a>                                                                                                                                                                                                                                   |
| Von Willebrand Factor                                                               | Invitrogen             | LSEHVWF  | <a href="https://www.fishersci.ca/shop/products/human-vwf-elisa-kit-thermo-scientific-pierce/ehvwf">https://www.fishersci.ca/shop/products/human-vwf-elisa-kit-thermo-scientific-pierce/ehvwf</a>                                                                                                                                                                                                     |
| Syndecan-1                                                                          | Invitrogen             | LSEHSDC1 | <a href="https://www.fishersci.ca/shop/products/human-syndecan-1-sdc1-elisa-kit-thermo-scientific-pierce/ehsdc1?searchHijack=true&amp;searchTerm=EHSDC1&amp;searchType=RAPID&amp;matchedCatNo=EHSDC1">https://www.fishersci.ca/shop/products/human-syndecan-1-sdc1-elisa-kit-thermo-scientific-pierce/ehsdc1?searchHijack=true&amp;searchTerm=EHSDC1&amp;searchType=RAPID&amp;matchedCatNo=EHSDC1</a> |
